# Supplementary material for: Analysis of long non-coding RNAs associated with disulfidptosis for prognostic signature and immunotherapy response in uterine corpus endometrial carcinoma
Source: PubMed Central journal article supplement (PMC10721879; doi:10.1038/s41598-023-49750-6), 2023-12-14
Supplement: 41598_2023_49750_MOESM1_ESM.pdf [file 41598_2023_49750_MOESM1_ESM.pdf]

# Supplementary Information

## Analysis of long non-coding RNAs associated with disulfidptosis for prognostic signature and immunotherapy response in uterine corpus endometrial carcinoma

Bohan Li<sup>1,5</sup>, Xiaoling Li<sup>2,5</sup>, Mudan Ma<sup>1,5</sup>, Qing Wang<sup>3,5</sup>, Jie Shi<sup>1\*</sup>, Chao Wu<sup>4\*</sup>

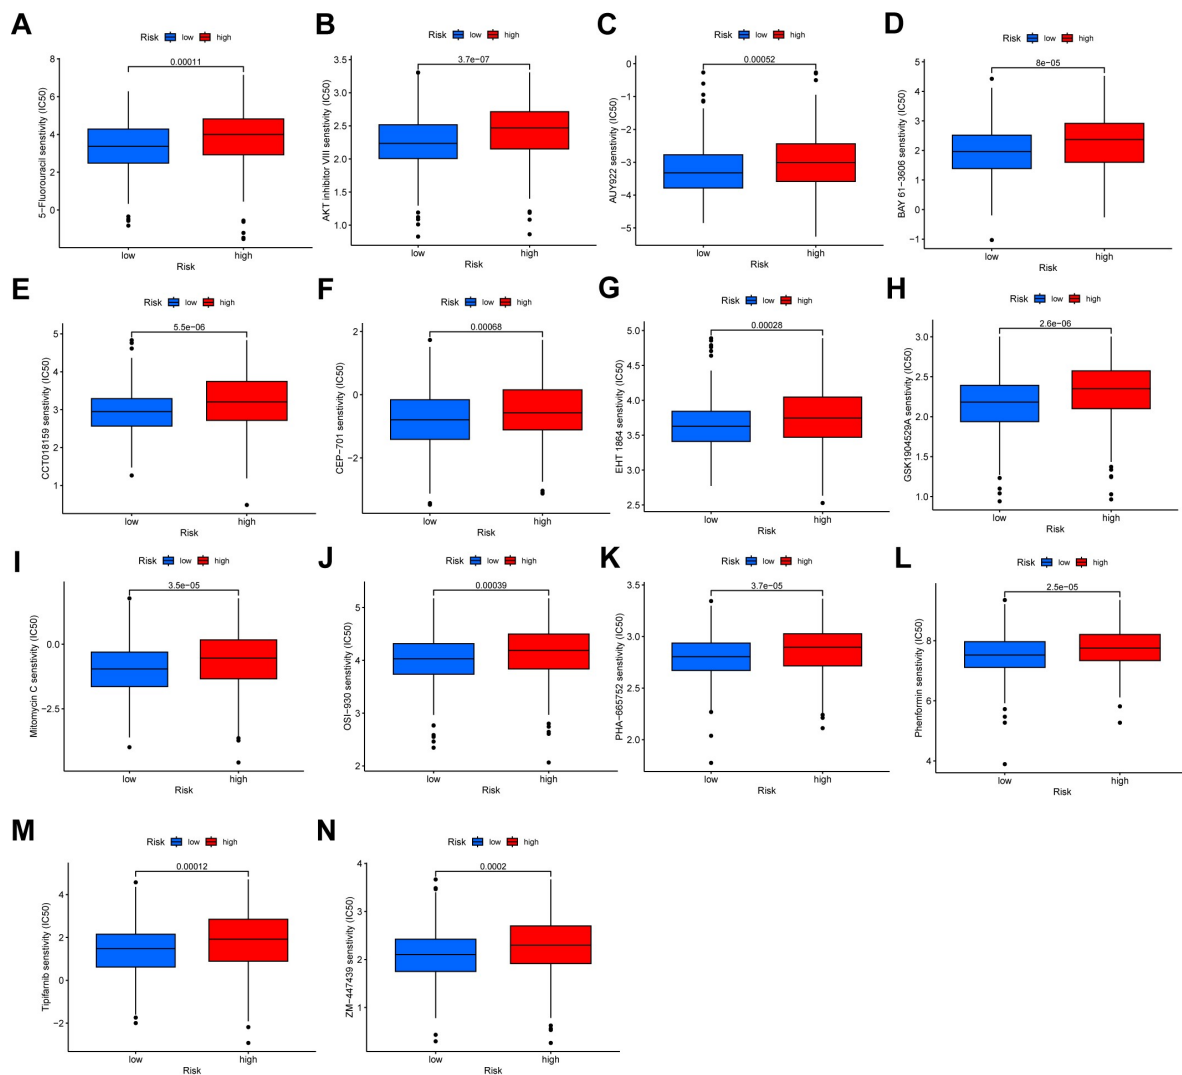

**Supplementary Fig. S1** Drug susceptibility analysis. (A–N) Fourteen drugs demonstrated lower IC50 values for patients in the low-risk group

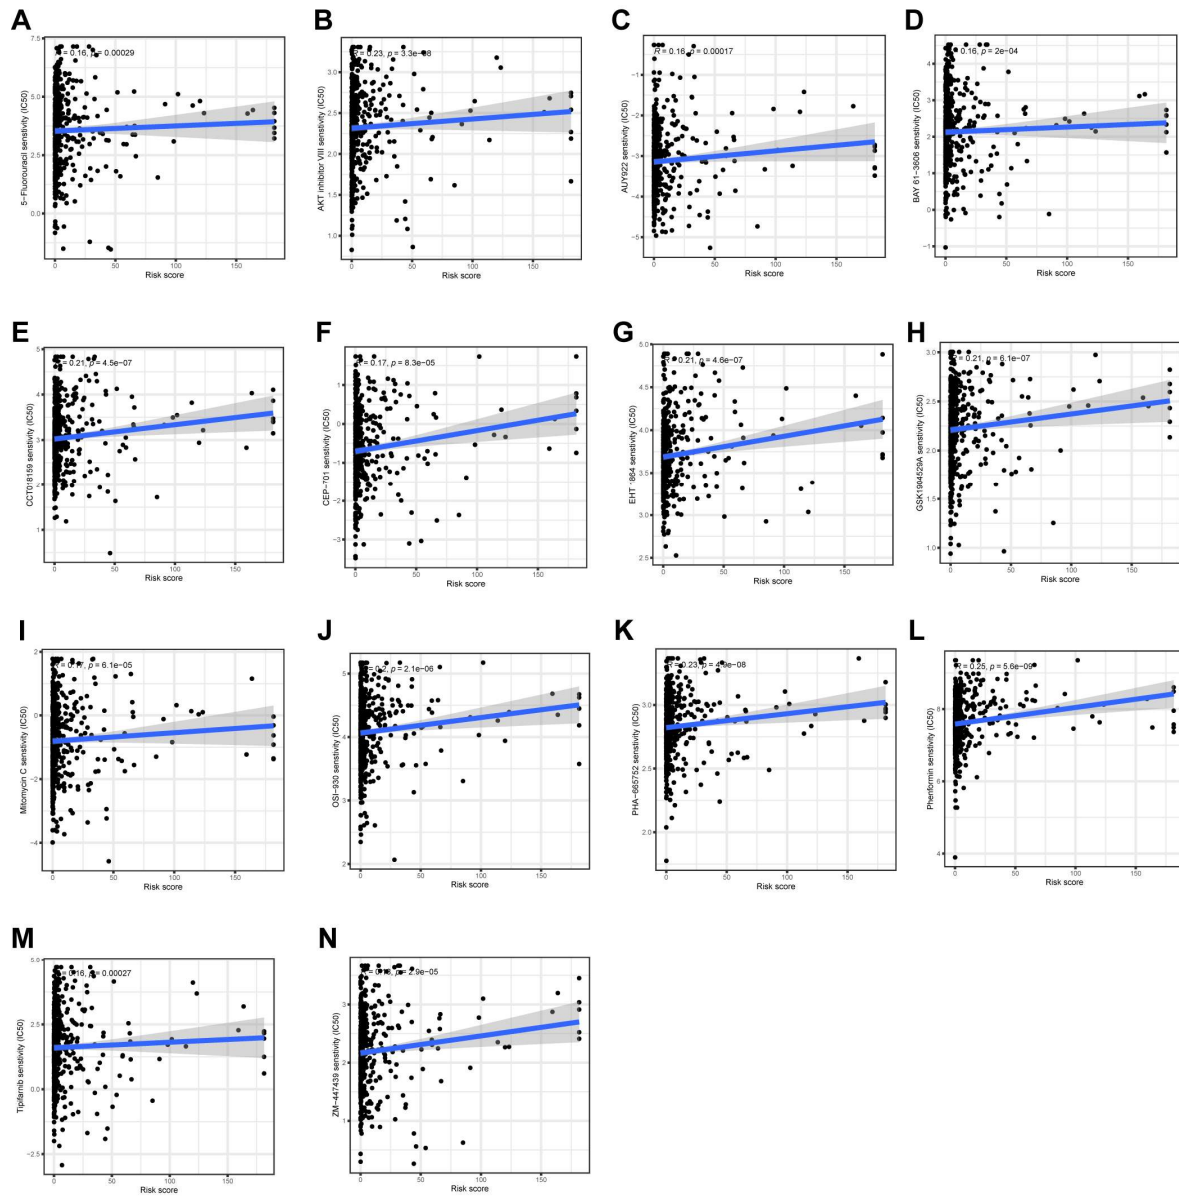

**Supplementary Fig. S2** Drug susceptibility analysis. (A–N) The correlation between the IC<sub>50</sub> values and risk scores of the fourteen aforementioned drugs
